# Supplementary material
Source: PubMed Central journal article supplement (PMC7784748)
Supplement: PRO-30-328-s001.pdf [file PRO-30-328-s001.pdf]

## Supporting information

### **Reaction mechanism of tetrathionate hydrolysis based on the crystal structure of tetrathionate hydrolase from *Acidithiobacillus ferrooxidans***

Tadayoshi Kanao, Naruki Hase, Hisayuki Nakayama, Kyoya Yoshida, Kazumi Nishiura,

Megumi Kosaka, Kazuo Kamimura, Yu Hirano, and Taro Tamada

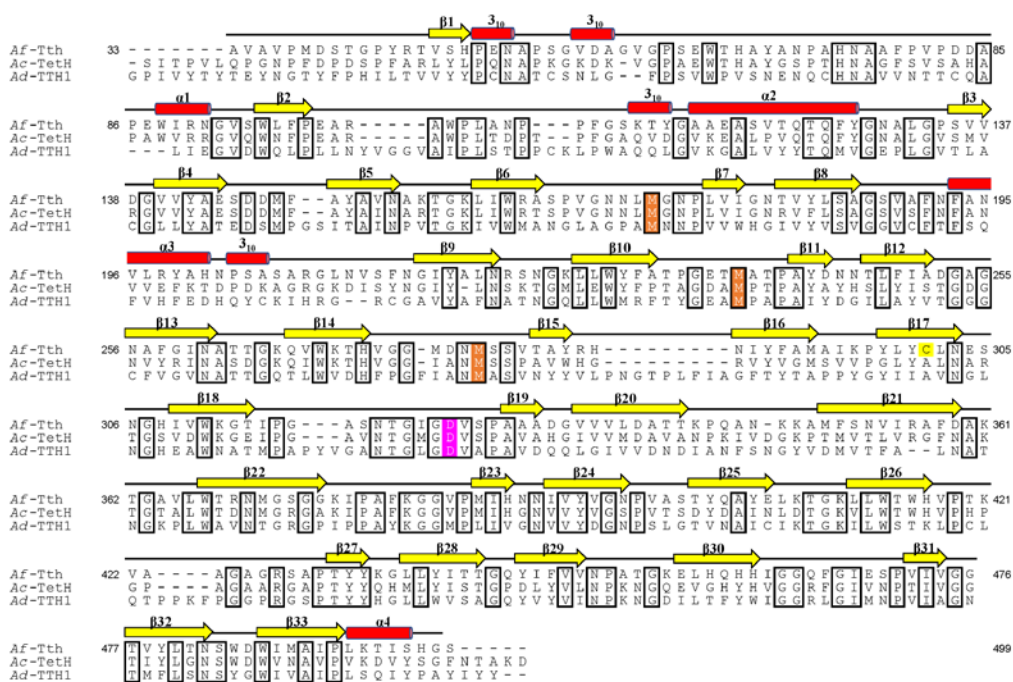

**Figure S1. Sequence alignment among three tetrathionate hydrolases (4THases) from *Acidithiobacillus* species.** *Af-Tth*, 4THase from *A. ferrooxidans*; *Ac-TetH*, 4THase from *A. caldus*; and *Ad-TTH1*: 4THase from *Ad. ambivalens*. Multiple alignment of protein sequences was done using ClustalX (Larkin *et al.*, 2007. *Bioinformatics*, 23, 2947-2948). Conserved amino acids are surrounded by rectangles. Three methionines (Met172, Met238, and Met279), Cys301 (only *Af-Tth*), and Asp325 are highlighted as orange, yellow, and magenta, respectively. The secondary structural elements of *Af-Tth* are drawn on the sequence alignment.

Blade I,  $\beta 1$  and  $\beta 3$ – $\beta 6$ ; blade II,  $\beta 7$ – $\beta 10$ ; blade III,  $\beta 11$ – $\beta 14$ ; blade IV:  $\beta 15$ – $\beta 18$ ; blade V,  $\beta 19$ – $\beta 22$ ; blade VI,  $\beta 23$ – $\beta 26$ ; blade VII,  $\beta 27$ – $\beta 30$ ; blade VIII,  $\beta 2$  and  $\beta 31$ – $\beta 33$ .

Disordered residues in the wild-type crystal: Leu197–Pro203, Ala345–Lys348, and Gly498–Ser499 (in chain A); Ala33, Lys342–Ala349, and Gly498–Ser499 (in chain B); Ala33, Phe193–Ala205, Ser319–Gly322, Lys342–Phe351, Gly374–Ile377, Val422–Ala424, and His497–Ser499 (in chain C); Ala33 and Gln344–Met350 (in chain D); Ala33–Val34, Val57–Ala59, Pro343–Ala349, and His497–Ser499 (in chain E); and Ala33, Ser319–Gly324, Lys347–Lys348, and Ser499 (in chain F).

(a)

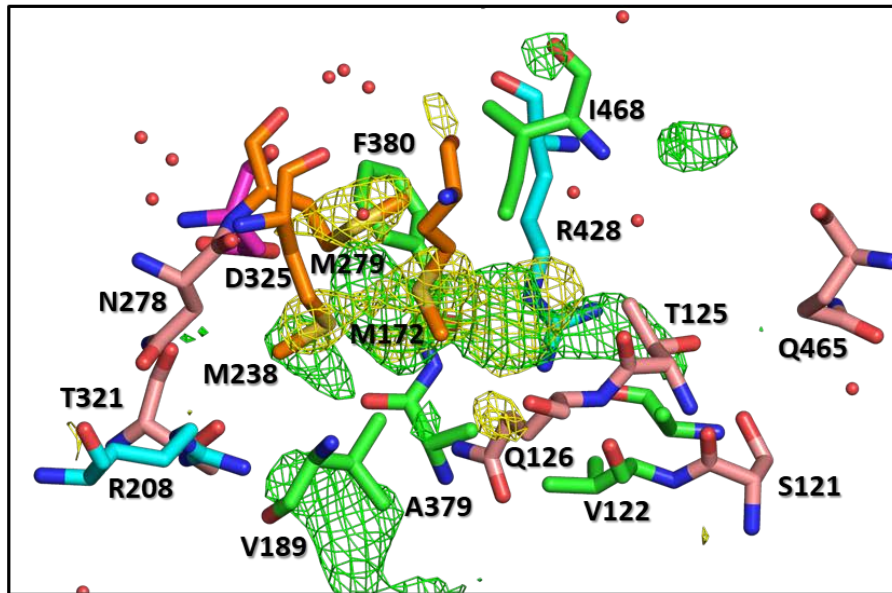

(b)

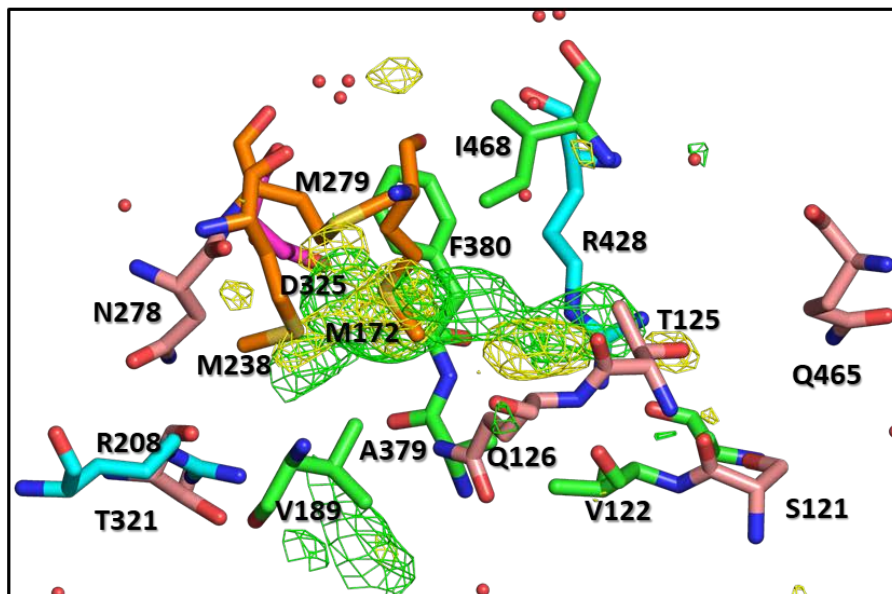

(c)

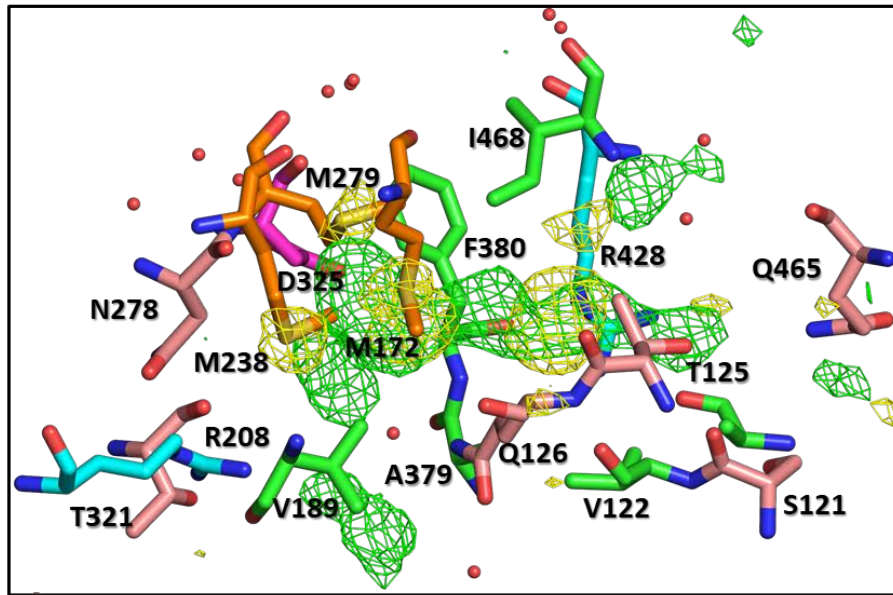

(d)

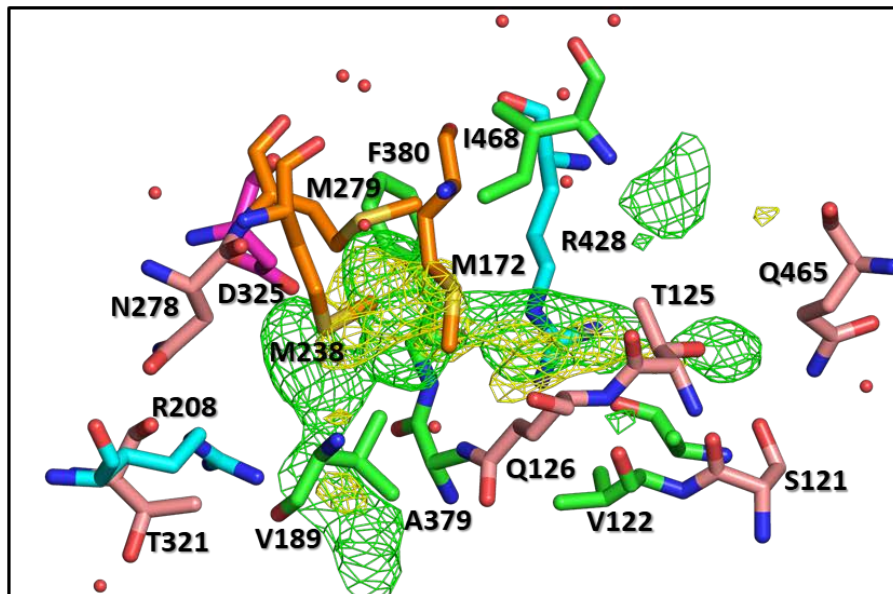

(e)

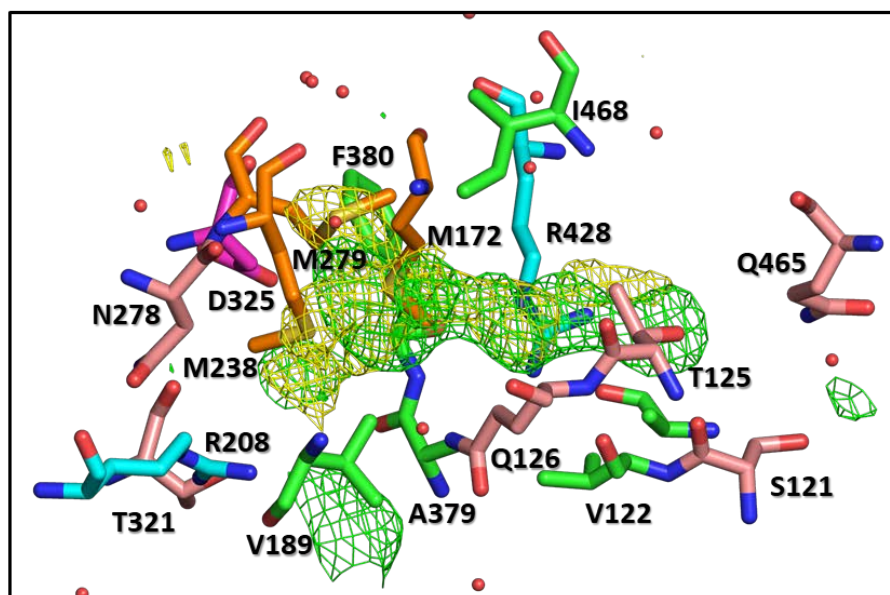

**Figure S2. Electron densities in the cavity of the substrate-soaked structure.** (a) Chain A, (b) chain B, (c) chain D, (d) chain E, and (e) chain F. Side chains of Val122, Thr125, Gln126, Met172, Val189, Arg208, Met238, Asn278, Met279, Thr321, Asp325, Ala379, Phe380, Arg428, Gln465, and Ile468 are indicated as a stick model. Water molecules are indicated as a sphere and ball model. Methionines, arginines, aspartic acid, hydrophobic residues (Val, Ala, Phe, Ile), and other residues (Ser, Thr, Asn, Gln) are colored orange, cyan, magenta, green, and wheat, respectively. The green and yellow contour shows the  $F_o - F_c$  omit map ( $3.0\sigma$ ,  $\lambda = 1.0 \text{ \AA}$ ) and anomalous difference map ( $3.0\sigma$ ,  $\lambda = 1.9 \text{ \AA}$ ), respectively.

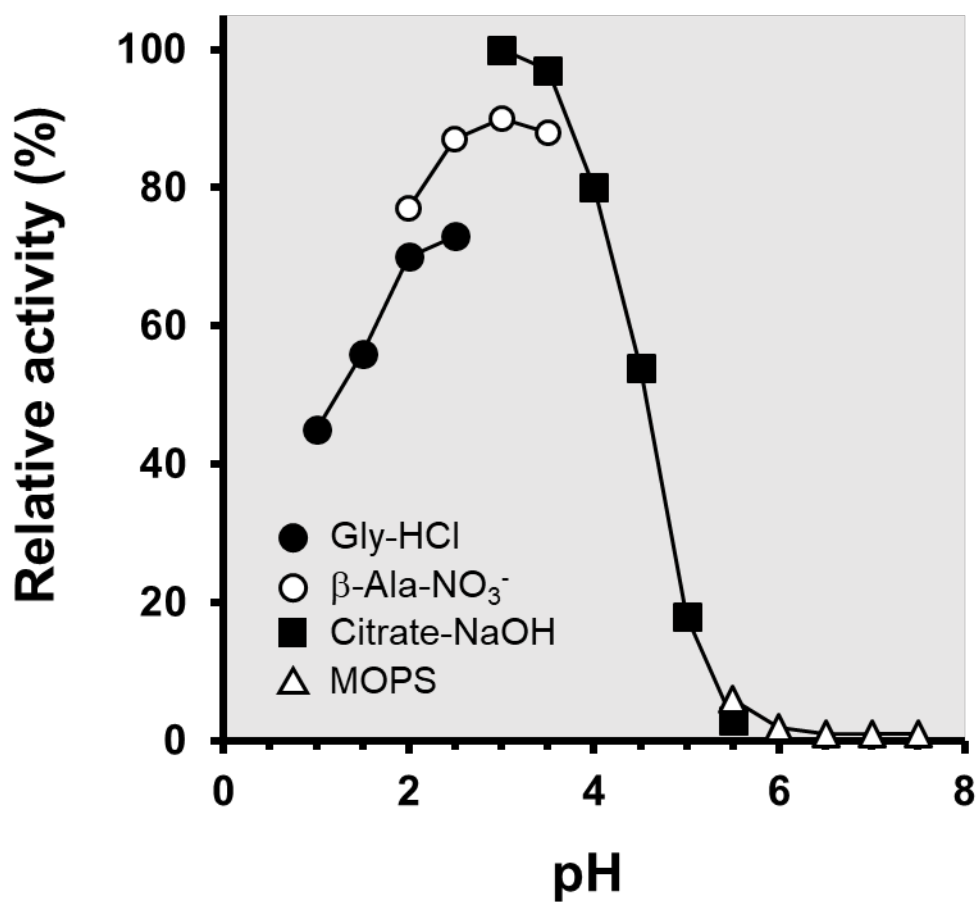

**Figure S3. pH profile of tetrathionate hydrolase from *A. ferrooxidans* (*Af*-Tth) activity.** *Af*-Tth activity was measured under various pH values. Symbols: closed circle, glycine-HCl buffer; open circle,  $\beta$ -alanine NO<sub>3</sub><sup>-</sup> buffer; closed square, citrate-NaOH buffer; and open triangle, MOPS.
